# Supplementary material
Source: publisher site journal article supplement (https://www.dovepress.com/article/224286)
Supplement: Supplementary file 1 [file get_supplementary_file.php]

## Supplementary Material

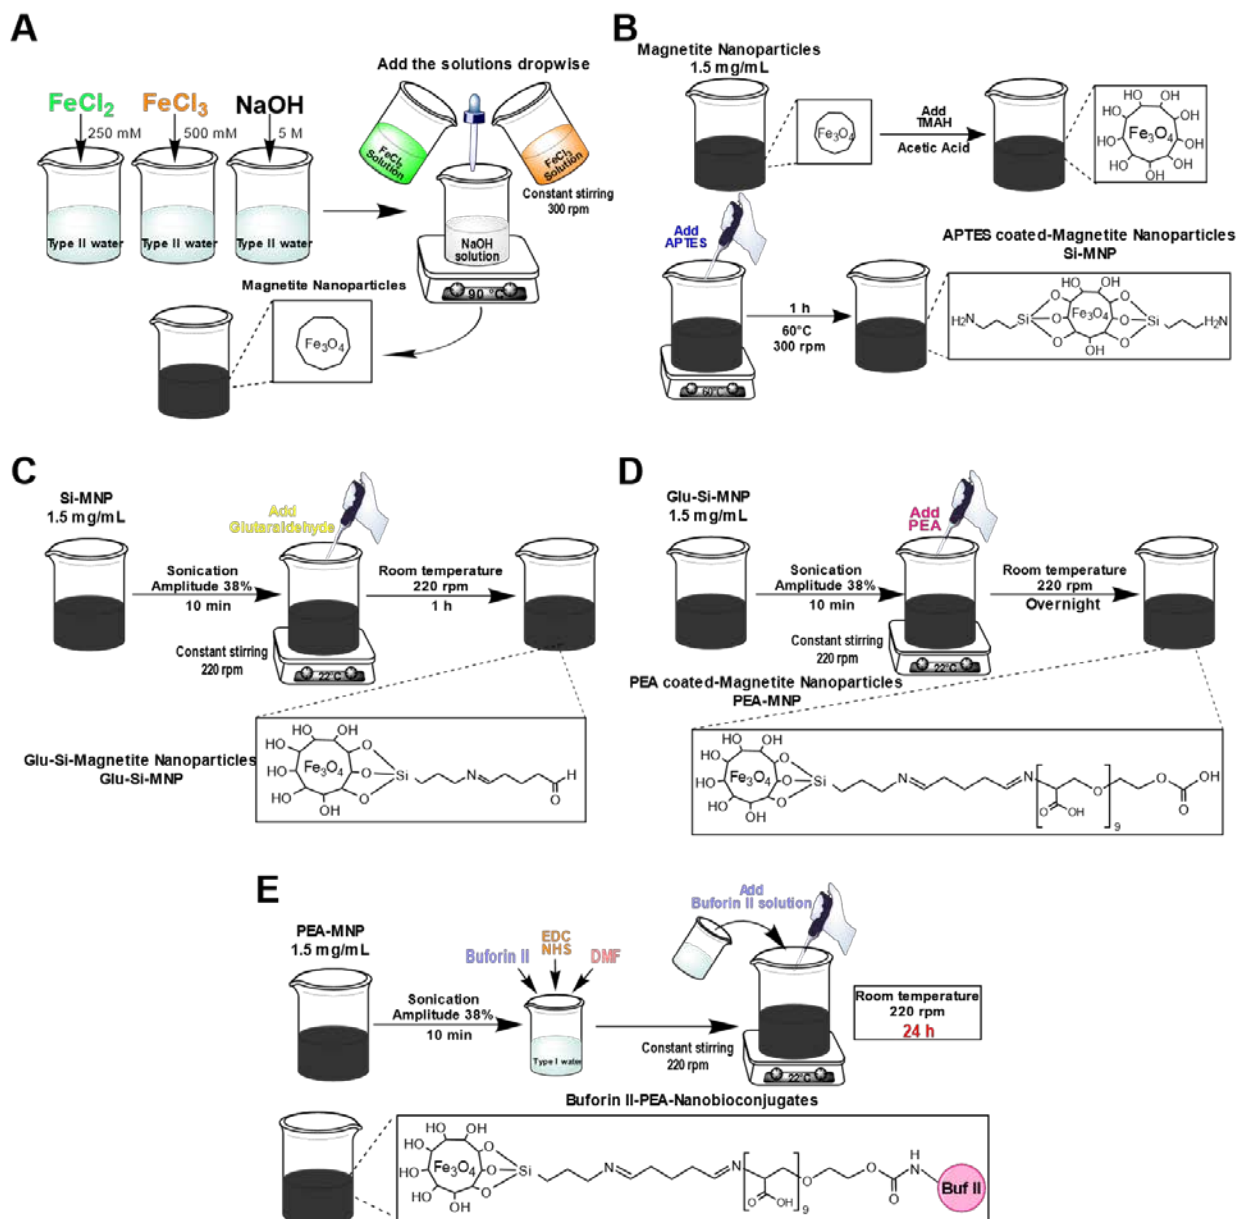

**Figure S1** (A) Synthesis of magnetite nanoparticles by chemical co-precipitation. (B) Silanization of magnetite nanoparticles with APTES. (C) Activation of amine groups on the conjugated APTES with the aid of glutaraldehyde. (D) Conjugation of oxidized PEA by its terminal amine group. (E) Conjugation of BUF-II by its N-terminal to carboxyl groups of PEA with the aid of EDC/NHS.
